# Supplementary material for: Systematic Review of Nano- and Microplastics’ (NMP) Influence on the Bioaccumulation of Environmental Contaminants: Part II—Freshwater Organisms
Source: MDPI journal article supplement (doi:10.3390/toxics11060474), 2023-05-23
Supplement: s1 [file s1]

**Table SI.1:** Detailed information on the studies extracted from the literature review using the search strategy, inclusion and exclusion criteria described in the methods section.

| n.a = not available |      | Study      |                |                         |                                          | Microplastic |               |           |          | Contaminant                                          |                | Organisms                               |             | Outcomes                                               |
|---------------------|------|------------|----------------|-------------------------|------------------------------------------|--------------|---------------|-----------|----------|------------------------------------------------------|----------------|-----------------------------------------|-------------|--------------------------------------------------------|
| ID                  | Year | Media      | Type           | Exposure                | MP treatment                             | Type         | Size          | Form      | Material | Name                                                 | Chemical group | Species                                 | Group       | Influenced bioaccumulation?                            |
| 3                   | 2020 | Freshwater | Lab experiment | water                   | no                                       | NP           | 300-600 nm    | spherical | PS       | Ag                                                   | metals         | <i>D. magna</i>                         | Zooplakton  | yes, increased                                         |
| 3                   | 2020 | Freshwater | Lab experiment | water                   | no                                       | NP           | 300-900 nm    | spherical | PE       | Ag                                                   | metals         | <i>D. magna</i>                         | Zooplakton  | yes, increased                                         |
| 31                  | 2022 | Freshwater | Lab experiment | water                   | no                                       | NP           | 50 nm         | spherical | PS       | Al2O3, CeO2                                          | nanoparticles  | <i>D. rerio</i>                         | fish        | yes, increased                                         |
| 41                  | 2017 | Freshwater | Lab experiment | water                   | no                                       | NP           | 50 nm         | spherical | PS       | Bisphenol A                                          | phenolics      | <i>D. rerio</i>                         | fish        | yes, increased                                         |
| 42                  | 2022 | Freshwater | Lab experiment | water                   | no                                       | MP           | 5 um          | spherical | PS       | Cd                                                   | metals         | <i>D. rerio</i>                         | fish        | no                                                     |
| 66                  | 2018 | Freshwater | Lab experiment | food                    | no                                       | MP           | 100 to 500 µm | spherical | PE       | PCBs                                                 | PCBs           | <i>C.auratus</i>                        | fish        | yes, decreased                                         |
| 74                  | 2020 | Freshwater | Lab experiment | water                   | pre-sorption                             | MP           | 48 um         | spherical | PMMA     | benzo(k)fluoranthene                                 | PAHs           | <i>D. magna and Chironomus riparius</i> | zooplankton | yes, increased (chironomus) and decreased (daphnia)    |
| 74                  | 2020 | Freshwater | Lab experiment | food (trophic transfer) | pre-incubation and then daphia ingestion | MP           | 48 um         | spherical | PMMA     | benzo(k)fluoranthene                                 | PAHs           | <i>D. rerio</i>                         | fish        | no                                                     |
| 83                  | 2021 | Freshwater | Lab experiment | water                   | no                                       | MP           | 5 um          | spherical | PS       | sulfamethoxazole (SMX) and the β-blocker propranolol | PPCPs          | <i>Oreochromis niloticus</i>            | fish        | yes, increased                                         |
| 88                  | 2022 | Freshwater | Lab experiment | water                   | no                                       | MP           | 100–150 µm    | spherical | PS       | Triclosan                                            | PPCPs          | <i>n.a</i>                              | fish        | yes, increased                                         |
| 89                  | 2019 | Freshwater | Lab experiment | water                   | no                                       | NP           | 100 nm        | spherical | PS       | PCBs                                                 | PCBs           | <i>D. magna</i>                         | zooplankton | yes, increased                                         |
| 94                  | 2017 | Freshwater | in vitro       | water                   | pre-incubation and no                    | MP           | 10–106 µm     | spherical | PE       | Ag                                                   | metals         | <i>O. mykiss</i>                        | fish        | no                                                     |
| 95                  | 2015 | Freshwater | Lab experiment | water                   | pre-incubation and no                    | MP           | 10–106 µm     | spherical | PE       | Ag                                                   | metals         | <i>D. rerio</i>                         | fish        | yes, decreased (pre-sorption) and no (no pre-sorption) |
| 97                  | 2017 | Freshwater | Lab experiment | water                   | no                                       | NP           | 180-200 nm    | spherical | PS       | Ni                                                   | metals         | <i>D. magna</i>                         | zooplankton | no                                                     |

|     |      |            |                           |                |                |    |                             |           |     |                                                                           |                |                                              |                    |                       |
|-----|------|------------|---------------------------|----------------|----------------|----|-----------------------------|-----------|-----|---------------------------------------------------------------------------|----------------|----------------------------------------------|--------------------|-----------------------|
| 108 | 2022 | Freshwater | Lab experiment            | water          | no             | MP | 50–70 µm                    | irregular | PS  | Difenoconazole                                                            | pesticides     | <i>D. rerio</i>                              | fish               | yes, decreased        |
| 108 | 2022 | Freshwater | Lab experiment            | water          | no             | MP | 9–10 µm                     | spherical | PS  | Difenoconazole                                                            | pesticides     | <i>D. rerio</i>                              | fish               | no                    |
| 110 | 2022 | Freshwater | Lab experiment            | water          | pre-incubation | MP | 180–430 µm                  | irregular | PE  | PCBs                                                                      | PCBs           | <i>D. rerio</i>                              | fish               | no                    |
| 112 | 2022 | Freshwater | Lab experiment            | water          | no             | NP | 75 nm                       | spherical | PS  | Cu                                                                        | metals         | <i>E. gracilis</i>                           | protozoan          | no                    |
| 117 | 2021 | Freshwater | Lab experiment            | water          | no             | MP | 0–1.5, 10–60, and 60–230 µm | irregular | PS  | pyrene                                                                    | PAHs           | <i>D. magna</i>                              | zookplankton       | yes, increased        |
| 119 | 2020 | Freshwater | Lab experiment (kinetics) | water          | pre-incubation | NP | 117 nm                      | spherical | PS  | acenaphthene, fluorene, phenanthrene, anthracene, fluoranthene and pyrene | PAHs           | <i>D. magna</i>                              | zookplankton       | yes, decreased        |
| 124 | 2022 | Freshwater | Lab experiment            | water          | no             | NP | 100nm                       | spherical | PS  | dibutyl phthalate                                                         | alkylphenols   | <i>S.coelicolor</i>                          | bacteria           | yes, decreased        |
| 127 | 2018 | Freshwater | Lab experiment            | water          | pre-incubation | MP | 5 um                        | spherical | PS  | Cd                                                                        | metals         | <i>D. rerio</i>                              | fish               | yes, increased        |
| 128 | 2022 | Freshwater | Lab experiment            | water          | pre-incubation | NP | 80 nm                       | spherical | PS  | Cd                                                                        | metals         | <i>B. aeruginosa</i>                         | gastropod          | yes, increased        |
| 130 | 2016 | Freshwater | Lab experiment            | water          | no             | NP | 50 nm                       | spherical | PS  | phenanthrene                                                              | PAHs           | <i>D. magna</i>                              | zooplankton        | yes, increased        |
| 130 | 2016 | Freshwater | Lab experiment            | water          | no             | MP | 10 um                       | spherical | PS  | phenanthrene                                                              | PAHs           | <i>D. magna</i>                              | zooplankton        | no                    |
| 139 | 2021 | Freshwater | Lab experiment            | water          | pre-sorption   | MP | 250-500nm                   | irregular | PE  | benzophenone-3                                                            | benzophenone-3 | <i>D. magna</i>                              | zooplankton        | yes, increased        |
| 145 | 2022 | Freshwater | Lab experiment            | water          | pre-incubation | MP | 3 um                        | spherical | PS  | Pb                                                                        | metals         | <i>P. crispus</i> & <i>V. denseserrulata</i> | macrophytes/plants | no                    |
| 147 | 2018 | Freshwater | Lab experiment            | water          | no             | MP | 1 and 5 µm                  | spherical | nd  | Hg                                                                        | metals         | <i>C. fluminea</i>                           | bivalve            | yes, decreased        |
| 154 | 2019 | Freshwater | Lab experiment (kinetics) | water          | pre-incubation | NP | 100nm                       | spherical | PS  | Cu                                                                        | metals         | <i>D. rerio</i>                              | fish               | yes, increased        |
| 154 | 2019 | Freshwater | Lab experiment (kinetics) | water          | pre-incubation | MP | 20 um                       | spherical | PS  | Cu                                                                        | metals         | <i>D. rerio</i>                              | fish               | yes, increased        |
| 156 | 2020 | Freshwater | Lab experiment            | water and food | no             | NP | 700 nm                      | spherical | PS  | racemic methamphetamine                                                   | PPCPs          | <i>C. cathayensis</i>                        | snail              | yes, increased and no |
| 157 | 2019 | Freshwater | Lab experiment            | water          | no             | MP | <10 µm                      | spherical | PVC | venlafaxine and O-desethylvenlafaxine                                     | PPCPs          | <i>M. anguillicaudatus</i>                   | Fish               | yes, increased        |

|     |      |            |                |                       |                |    |            |           |             |                                    |                      |                          |               |                              |
|-----|------|------------|----------------|-----------------------|----------------|----|------------|-----------|-------------|------------------------------------|----------------------|--------------------------|---------------|------------------------------|
| 171 | 2021 | Freshwater | Lab experiment | water                 | no             | MP | 1-5 um     | spherical | nd          | Cu                                 | metals               | <i>D. rerio</i>          | fish          | no                           |
| 175 | 2022 | Freshwater | Lab experiment | water                 | pre-incubation | MP | 150 µm     | irregular | PE          | chlorpyrifos and hexachlorobenzene | pesticides           | <i>D. rerio</i>          | fish          | yes, decreased and no        |
| 180 | 2021 | Freshwater | Lab experiment | water                 | pre-incubation | MP | 1–15 µm    | irregular | PE, PP, PVC | triclosan                          | PPCPs                | <i>D. rerio</i>          | fish          | yes, increased and decreased |
| 189 | 2020 | Freshwater | Lab experiment | water                 | no             | MP | 1.0 µm     | spherical | PS          | Ag                                 | metals               | <i>E. coli</i>           | bacteria      | yes, decreased               |
| 189 | 2020 | Freshwater | Lab experiment | water                 | no             | NP | 0.1 µm     | spherical | PS          | Ag                                 | metals               | <i>E. coli</i>           | bacteria      | yes, decreased               |
| 213 | 2020 | Freshwater | Lab experiment | water                 | no             | NP | 600 nm     | spherical | PS          | ibuprofen                          | PPCPs                | <i>C. pyrenoidosa</i>    | phytoplankton | no                           |
| 223 | 2021 | Freshwater | Lab experiment | sediment (Freshwater) | pre-incubation | MP | n.a        | irregular | PVC         | Cd                                 | metals               | <i>V. natans</i>         | Plant         | no                           |
| 227 | 2018 | Freshwater | Lab experiment | water                 | pre-incubation | MP | 32–40 µm   | spherical | PS          | Cd                                 | metals               | <i>S. aequifasciatus</i> | fish          | yes, decreased               |
| 235 | 2021 | Freshwater | Lab experiment | water                 | pre-incubation | MP | 150 um     | irregular | PS          | Phenanthrene                       | PAHs                 | <i>D. rerio</i>          | fish          | yes, increased               |
| 238 | 2020 | Freshwater | Lab experiment | water                 | pre-incubation | MP | 5 um       | spherical | PS          | F-53B                              | PFASs                | <i>D. rerio</i>          | fish          | yes, decreased               |
| 240 | 2022 | Freshwater | Lab experiment | water                 | pre-incubation | MP | 5 um       | spherical | PS          | Pb                                 | metals               | <i>E. sinensis</i>       | crab          | yes, increased               |
| 243 | 2021 | Freshwater | Lab experiment | water                 | no             | MP | 5 um       | spherical | PS          | Tetracycline                       | PPCPs                | <i>C. carpio</i>         | fish          | yes, decreased               |
| 244 | 2022 | Freshwater | Lab experiment | water                 | no             | NP | 100 nm     | spherical | PS          | Cu                                 | metals               | <i>O. niloticus</i>      | fish          | yes, increased               |
| 245 | 2021 | Freshwater | Lab experiment | water                 | pre-sorption   | MP | 100–150 µm | spherical | PS          | 9-NAnt                             | PAHs                 | <i>D. rerio</i>          | fish          | yes, increased and decreased |
| 248 | 2019 | Freshwater | Lab experiment | water                 | no             | NP | 100 nm     | spherical | PS          | Roxithromycin                      | PPCPs                | <i>O. niloticus</i>      | fish          | yes, increased and decreased |
| 251 | 2022 | Freshwater | Lab experiment | water                 | no             | MP | 5um        | spherical | PS          | ZnO NPs, ZnSO4                     | nanoparticles, metal | <i>D. rerio</i>          | fish          | yes, increased and decreased |
| 253 | 2021 | Freshwater | Lab experiment | water                 | pre-incubation | NP | 100 nm     | spherical | PS          | ethylhexyl salicylate              | PPCPs                | <i>D. rerio</i>          | fish          | yes, increased               |
| 254 | 2022 | Freshwater | Lab experiment | water                 | pre-incubation | NP | 101 nm     | spherical | PS          |                                    | PPCPs                | <i>D. rerio</i>          | fish          | yes, increased               |
| 257 | 2022 | Freshwater | Lab experiment | water                 | no             | MP | 5 um       | spherical | PS          | MeHg                               | metals               | <i>D. rerio</i>          | fish          | yes, increased               |
